# Supplementary material for: Phenotypic presentations of paraneoplastic neuropathies associated with MAP1B-IgG
Source: PubMed Central journal article supplement — J Neurol Neurosurg Psychiatry. 2019 Dec 4;91(3):328–30. doi: 10.1136/jnnp-2019-322175 (PMC7035677; doi:10.1136/jnnp-2019-322175), 2019-12-04
Supplement: jnnp-2019-322175supp003.pdf [file jnnp-2019-322175supp003.pdf]

**Supplementary Table:** Demographics and clinical characteristics of paraneoplastic MAP1B-IgG neuropathy in comparison to ANNA1-IgG neuropathy

|                                               | <b>MAP1B-IgG only<br/>(25)</b> | <b>ANNA1-IgG only<br/>(17)</b> | <b>p-value</b> |
|-----------------------------------------------|--------------------------------|--------------------------------|----------------|
| <b>Age, median (range)</b>                    | 69<br>(22-82)                  | 59<br>(22-73)                  | 0.018          |
| <b>Female (%)</b>                             | 8 (32)                         | 11 (65)                        | 0.037          |
| <b>Smoking (%)</b>                            | 11 (100)                       | 14 (88)                        | NS             |
| <b>Malignancy (%)</b>                         | 16 (89)                        | 13 (76)                        | NS             |
| <b>SCC (%)</b>                                | 11 (69)                        | 11 (65)                        | NS             |
| <b>Neuropathy as initial symptom (%)</b>      | 18 (75)                        | 15 (88)                        | NS             |
| <b>Weakness (%)</b>                           | 15 (63)                        | 12 (75)                        | NS             |
| <b>Symmetry (%)</b>                           | 12/19 (63)                     | 13 (76)                        | NS             |
| <b>Subacute onset (%)</b>                     | 9/19 (47)                      | 2 (12)                         | 0.031          |
| <b>Sensory neuronopathy (%)</b>               | 7 (28)                         | 13 (76)                        | 0.004          |
| <b>Polyradiculoneuropathy<sup>a</sup> (%)</b> | 13 (52)                        | 2 (12)                         | 0.0504         |
| <b>Neuropathic pain (%)</b>                   | 5 (20)                         | 10 (63)                        | 0.023          |
| <b>CNS involvement (%)</b>                    | 12 (48)                        | 10 (59)                        | NS             |
| <b>Autonomic dysfunction (%)</b>              | 5 (20)                         | 12 (75)                        | 0.003          |
| <b>GI dysmotility (%)</b>                     | 5 (20)                         | 7 (47)                         | NS             |
| <b>Myelopathy (%)</b>                         | 3 (13)                         | 2 (13)                         | NS             |

Abbreviation: ANNA1; anti-nuclear neuronal antibody-1, CRMP5; collapsin response-mediator protein-5, CSF; cerebrospinal fluid, IgG; immunoglobulin G, MAP1B; Microtubule-Associated Protein 1B, NS; not significant, SCC; small cell carcinoma, WBC; white blood cell

<sup>a</sup>No structural or compressive etiology for radiculopathy
