# Supplementary figures and images for: Phenotypic presentations of paraneoplastic neuropathies associated with MAP1B-IgG
Source: PubMed Central journal article supplement — J Neurol Neurosurg Psychiatry. 2019 Dec 4;91(3):328–30. doi: 10.1136/jnnp-2019-322175 (PMC7035677; doi:10.1136/jnnp-2019-322175), 2019-12-04

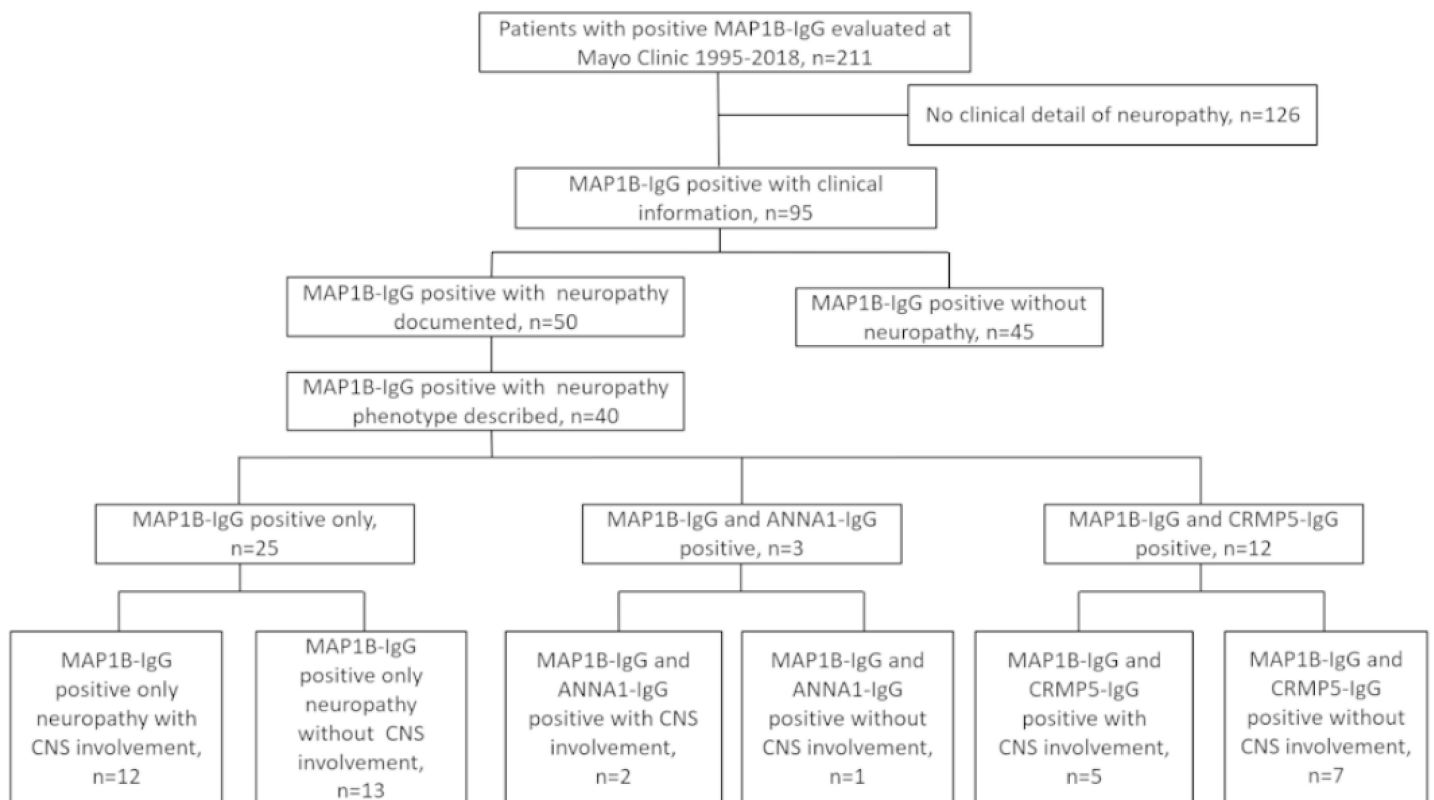

Supplement: jnnp-2019-322175supp002.pdf [file jnnp-2019-322175supp002.pdf]
